# Supplementary material for: Callosal Angle Sub-Score of the Radscale in Patients with Idiopathic Normal Pressure Hydrocephalus Is Associated with Positive Tap Test Response
Source: MDPI journal article supplement (doi:10.3390/jcm11102898), 2022-05-20
Supplement: s1 [file s1]

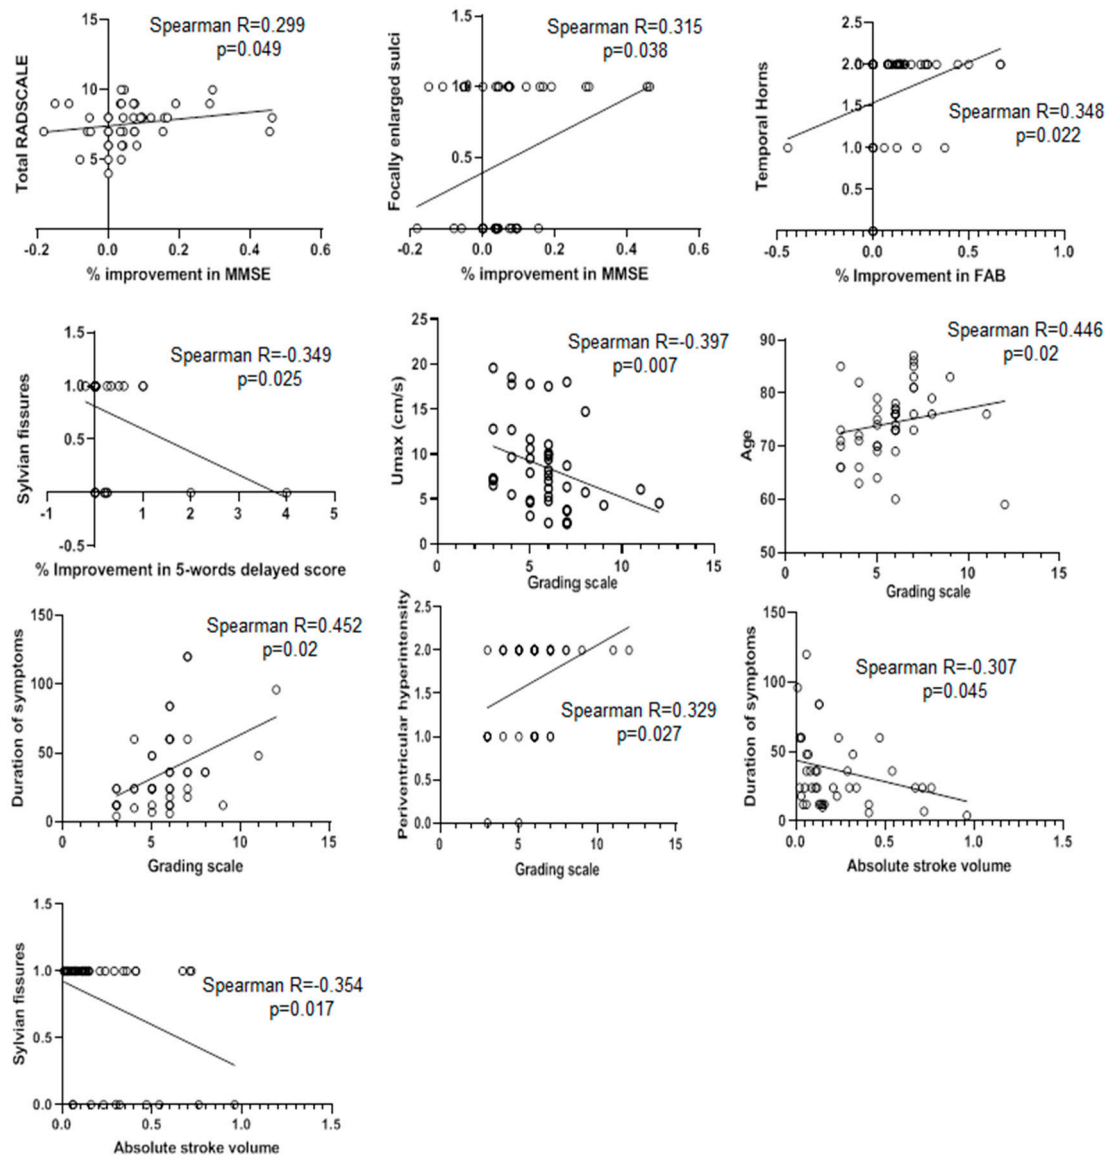

**Supplementary Figure S1.** Significant correlations among clinical and imaging parameters before Bonferroni correction. Significant positive correlations between iNPH Grading Scale with age of patients (spearman R=0.446, p=0.02), duration of symptoms (spearman R=0.452, p=0.02), and “periventricular hyperintensity” sub-score in brain MRI (spearman R=0.329, p=0.027), and a significant negative correlation between iNPH Grading Scale and absolute peak flow velocity (spearman R= -0.397, p=0.007). Percentile improvement in FAB score following TAP test had a significant positive correlation with Temporal Horns score (spearman R=0.348, p=0.022). Percentile improvement in 5-words delayed score during TAP test had a negative significant correlation with “Sylvian fissures” sub-score (spearman R= -0.349, p=0.022). Absolute stroke volume had negative significant correlation with the duration of the disease (spearman R= -0.307, p=0.045) and the “Sylvian fissures” sub-score (spearman R= -0.354, p=0.017).

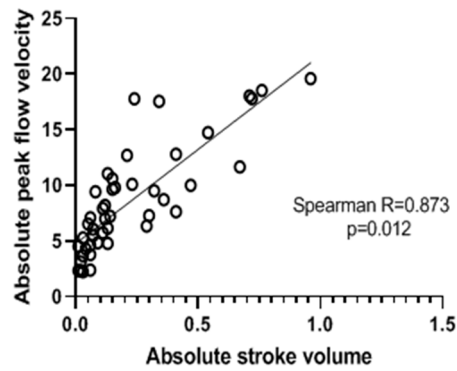

**Supplementary Figure S2.** Significant positive correlation of absolute stroke volume with absolute peak flow velocity of CSF.

**Supplementary Table S1.** Median percentile improvement of the parameters used on the implemented criteria for positive Tap test responder status, among responders and non-responders.

| Parameter                       | Median percentile improvement during Tap test |                         |
|---------------------------------|-----------------------------------------------|-------------------------|
|                                 | Tap test responders                           | Tap test non-responders |
| MMSE                            | 8%                                            | 3.5%                    |
| FAB                             | 16.6%                                         | 6.8%                    |
| 10-meter timed walk test: steps | 17.2%                                         | 1.5%                    |
| 10-meter timed walk test: time  | 18.1%                                         | 5.7%                    |

MMSE: MiniMental State Examination, FAB: Frontal Assessment Battery
